# Supplementary material
Source: PubMed Central journal article supplement (PMC1720072)
Supplement: archdisch_90_1_74__1.pdf [file archdisch_90_1_74__1.pdf]

**Table 3** Examination of heterogeneity

|                                         | <b>Ciarallo L, 1996</b>                                                                                                           | <b>Devi PR, 1997</b>                                                                                                        | <b>Gurkan F, 1999</b>                                                                                                       | <b>Cariallo L, 2000</b>                                                                                                                                                                                                                                         | <b>Scarfone RJ, 2000</b>                                   |
|-----------------------------------------|-----------------------------------------------------------------------------------------------------------------------------------|-----------------------------------------------------------------------------------------------------------------------------|-----------------------------------------------------------------------------------------------------------------------------|-----------------------------------------------------------------------------------------------------------------------------------------------------------------------------------------------------------------------------------------------------------------|------------------------------------------------------------|
| Patient selection<br>inclusion criteria | 6–18 yrs, PEFR <60% predicted after 3 doses of neb. $\beta_2$ agonist, poor medical team consider iv therapy necessary            | 1–12 yrs, 6–16 yrs, PEFR <60% predicted after 3 doses of neb. $\beta_2$ agonist (others N/A)                                | 6–17.9 yrs, PEFR <70% predicted after 3 doses of neb. $\beta_2$ agonist                                                     | 6–17.9 yrs, PEFR <70% predicted after 3 doses of ipratropium bromide or both                                                                                                                                                                                    | 1–18 yrs, Pulmonary index 8–13 (moderate to severe asthma) |
| Patient exclusion<br>criteria           | Temp >38.5°C, SBP <25th percentile for age, recent use of theophylline, history of cardiac, renal or pulmonary disease, pregnancy | Temp >38°C, Fever, SBP <25th percentile for age, recent use of theophylline, history of cardiac, renal or pulmonary disease | Temp >38°C, Fever, SBP <25th percentile for age, recent use of theophylline, history of cardiac, renal or pulmonary disease | Temp >38.5°C, PI <8 or >13, use of steroid use within 72 hours, concurrent bronchiolitis, history of lobar pneumonia, croup, or suspected foreign body aspiration, history of cystic fibrosis, BPD, CHD, liver or renal disease, sickle cell anaemia, pregnancy |                                                            |
| Patient number<br>(T:P*)                | 15:16                                                                                                                             | 24:23                                                                                                                       | 10:10                                                                                                                       | 16:14                                                                                                                                                                                                                                                           | 24:30                                                      |
| Mean age (T:P)                          | 11.4+/-3.5: 10.8+/-3.6                                                                                                            | 6.7+/-3.26: 6.75+/-3.5                                                                                                      | Overall 10.8+/-2.8                                                                                                          | mean 10.9+/-0.9: 12+/-1                                                                                                                                                                                                                                         | 6.75+/-3.6: 4.83+/-3.25                                    |
| %male(T:P)                              | 46.7%: 43.8%                                                                                                                      | 79.2%:73.9%                                                                                                                 | 60%: 50%                                                                                                                    | 68.8%: 50%                                                                                                                                                                                                                                                      | 58.3%: 46.7%                                               |
| Baseline SpO <sub>2</sub> (T:P)         | 92+/-3.7%: 93.9+/-2.5%                                                                                                            | 92.08+/-2.34%: 91.35+/-1.9%                                                                                                 | 91.8+/-3.2%: 91.4+/-3.6%                                                                                                    | 92+/-0.7%: 91+/-0.6%                                                                                                                                                                                                                                            | 93.9+/-2.2%: 94.1+/-2.4%                                   |
| Baseline %PEFR<br>predicted (T:P)       | 43.8+/-13.6%: 43+/-12.8%                                                                                                          | 30.08+/-13.96%: 27.14+/-18.42%                                                                                              | 46.8+/-10.4%: 46.2+/-11.2%                                                                                                  | N/A                                                                                                                                                                                                                                                             | N/A                                                        |
| Randomisation                           | Yes                                                                                                                               | Yes                                                                                                                         | Yes                                                                                                                         | Yes                                                                                                                                                                                                                                                             | Yes                                                        |
| Randomisation<br>concealment            | N/A                                                                                                                               | N/A                                                                                                                         | N/A                                                                                                                         | N/A                                                                                                                                                                                                                                                             | Yes                                                        |
| Blinding                                | Double                                                                                                                            | Double                                                                                                                      | Double                                                                                                                      | Double                                                                                                                                                                                                                                                          | Double                                                     |
| Dose of<br>magnesium<br>sulphate        | IV 25♣mg/kg                                                                                                                       | 25♣mg/kg                                                                                                                    | 40♣mg/kg                                                                                                                    | 40♣mg/kg                                                                                                                                                                                                                                                        | 75♣mg/kg                                                   |
| Mode<br>administration                  | of Infusion in 100♣ml of normal saline                                                                                            | Infusion as 50% Mg sulphate over                                                                                            | Infusion in 100♣ml normal saline over                                                                                       | Infusion in 100♣ml normal saline over                                                                                                                                                                                                                           | Infusion over 20♣min                                       |

|                                                                 | <b>Ciarallo L, 1996</b>                                                                                                            | <b>Devi PR, 1997</b>                                                                                      | <b>Gurkan F, 1999</b>                                                                                            | <b>Cariallo L, 2000</b>                                                                                                                             | <b>Scarfone RJ, 2000</b>                                                                              |
|-----------------------------------------------------------------|------------------------------------------------------------------------------------------------------------------------------------|-----------------------------------------------------------------------------------------------------------|------------------------------------------------------------------------------------------------------------------|-----------------------------------------------------------------------------------------------------------------------------------------------------|-------------------------------------------------------------------------------------------------------|
| IV magnesium sulphate                                           | 20♣min                                                                                                                             | solution over 20♣min                                                                                      |                                                                                                                  | 20♣min                                                                                                                                              |                                                                                                       |
| Co-therapies                                                    | IV methylprednisolone 2♣mg/kg to patients who had not received steroid, salbutamol at the discretion of doctor (mean 1.5×/patient) | IV /oral steroid, IV aminophylline infusion, nebulised salbutamol according to protocol based on response | methylprednisolone 2♣mg/kg to all patients, nebulised salbutamol at the discretion of doctor (mean 1.3×/patient) | IV methylprednisolone 2♣mg/kg to patients who had not received steroid, nebulised salbutamol and/or ipratropium bromide at the discretion of doctor | IV methylprednisolone 1♣mg/kg to all patients, nebulised salbutamol at 0♣min, 40♣min, 80♣min, 120♣min |
| Adverse effects                                                 | Nil                                                                                                                                | Epigastric warmth (12.5%), local pain (16.6%), local numbness (12.5%)                                     | Nil                                                                                                              | Nil                                                                                                                                                 | Nil                                                                                                   |
| Independent conclusion                                          | Effective                                                                                                                          | Effective                                                                                                 | Effective                                                                                                        | Effective                                                                                                                                           | Ineffective                                                                                           |
| Weight in meta-analysis of primary outcome (Fixed effect model) | 2.25                                                                                                                               | 5.51                                                                                                      | Not applicable                                                                                                   | 3.85                                                                                                                                                | 3.85                                                                                                  |

\*T:P, treatment group versus placebo group.
